# Supplementary material
Source: PubMed Central journal article supplement (PMC4125404)
Supplement: 4d7e50bd45bf17edc0075b10d0682e01_genetics.114.165860-2.pdf [file 4d7e50bd45bf17edc0075b10d0682e01_genetics.114.165860-2.pdf]

**Figure S2**  
**Regional correlation of  $r$  linkage statistic**

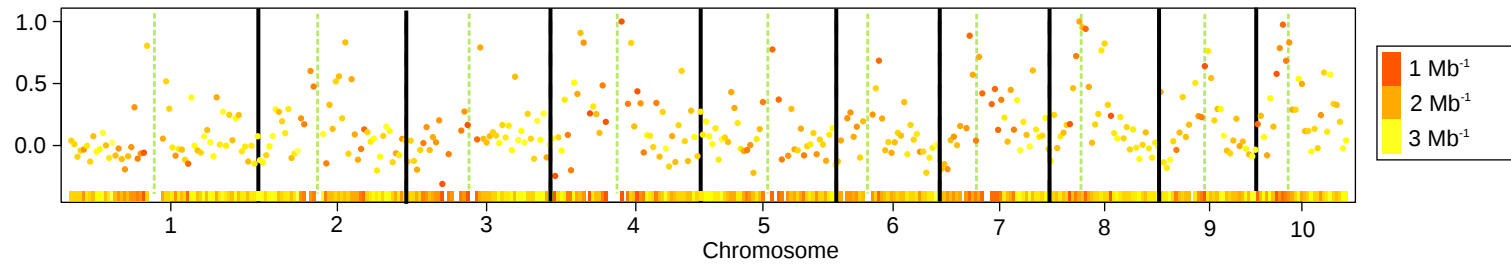

Figure S2 Correlation of  $r$  linkage statistic between Dent and Flint lines in consecutive bins of 5 megabase (Mb) width. The different colors of the points and the heatmap in the bottom of each sub-plot indicate the marker density within the bin ( $\text{Mb}^{-1}$ ). The green, dashed vertical bars indicate the physical positions of the centromeres, the solid, black bars separate the chromosomes
