# Supplementary material
Source: PubMed Central journal article supplement (PMC4125404)
Supplement: a7aff20b8947363035e1d5c0d67e2230_genetics.114.165860-5.pdf [file a7aff20b8947363035e1d5c0d67e2230_genetics.114.165860-5.pdf]

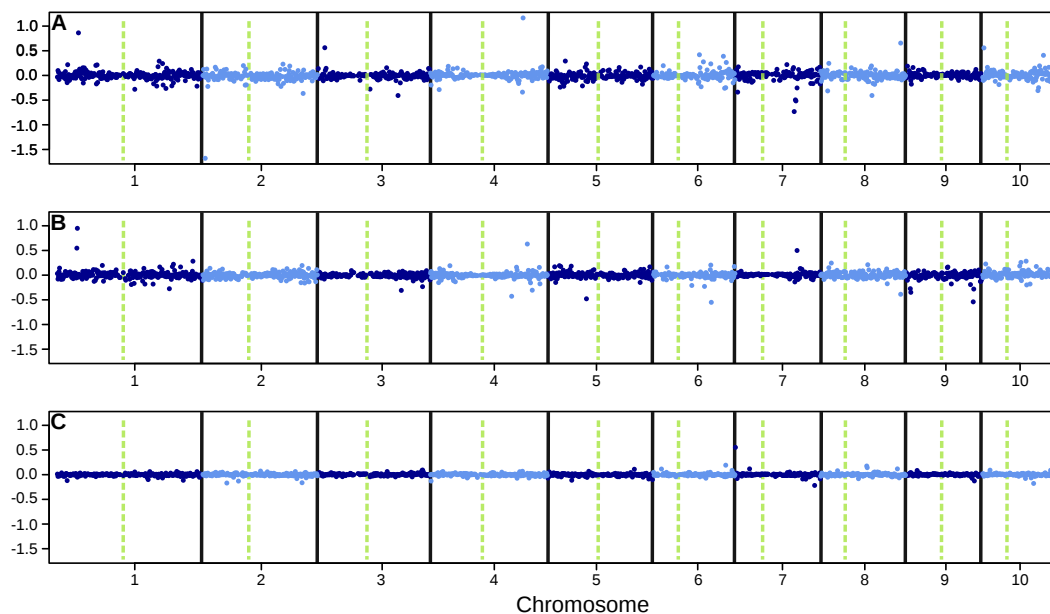

**Figure S3 Marker effect estimates for grain yield.** Posterior means of marker effect estimates for grain yield obtained by BayesB, using a subset of 1617 markers, and all 1254 hybrids. (A) additive marker effects for Dent, (B) additive marker effects for Flint, (C) dominance marker effects. The green, dashed vertical bars indicate the physical positions of the centromeres, the solid, black bars separate the chromosomes
