# Supplementary material
Source: PubMed Central journal article supplement (PMC4125404)
Supplement: ae795d5fe030df6ef78b626d87998c1d_genetics.114.165860-3.pdf [file ae795d5fe030df6ef78b626d87998c1d_genetics.114.165860-3.pdf]

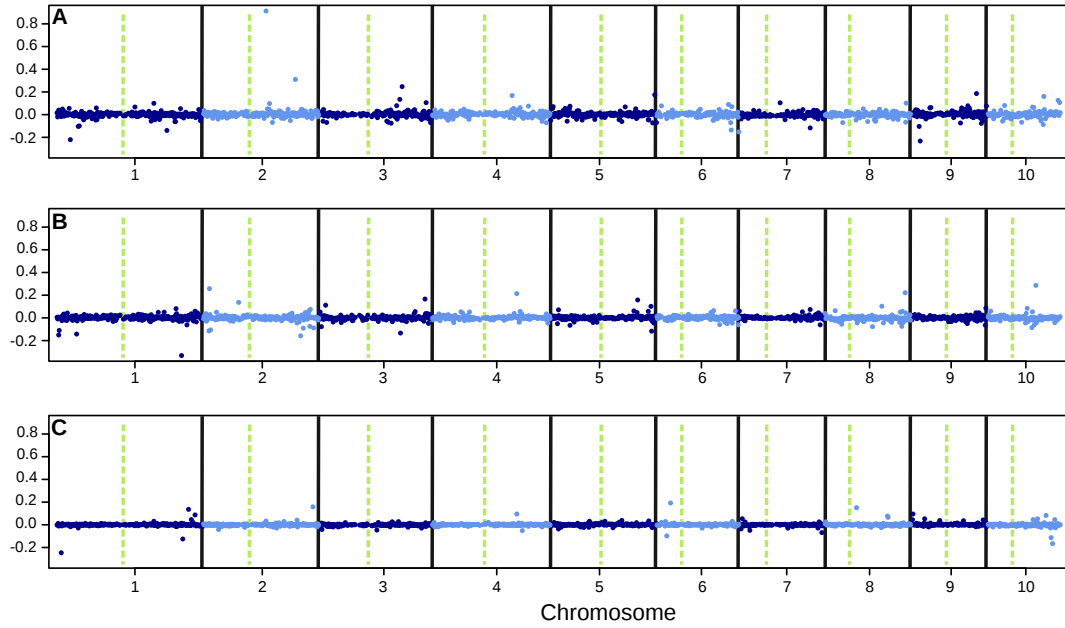

**Figure S4 Marker effect estimates for grain moisture.** Posterior means of marker effect estimates for grain moisture obtained by BayesB, using a subset of 1617 markers, and all 1254 hybrids. (A) additive marker effects for Dent, (B) additive marker effects for Flint, (C) dominance marker effects. The green, dashed vertical bars indicate the physical positions of the centromeres, the solid, black bars separate the chromosomes
