# Supplementary material
Source: PubMed Central journal article supplement (PMC4125404)
Supplement: b64ea1ccec1b54dd628f2f0666e0c259_genetics.114.165860-4.pdf [file b64ea1ccec1b54dd628f2f0666e0c259_genetics.114.165860-4.pdf]

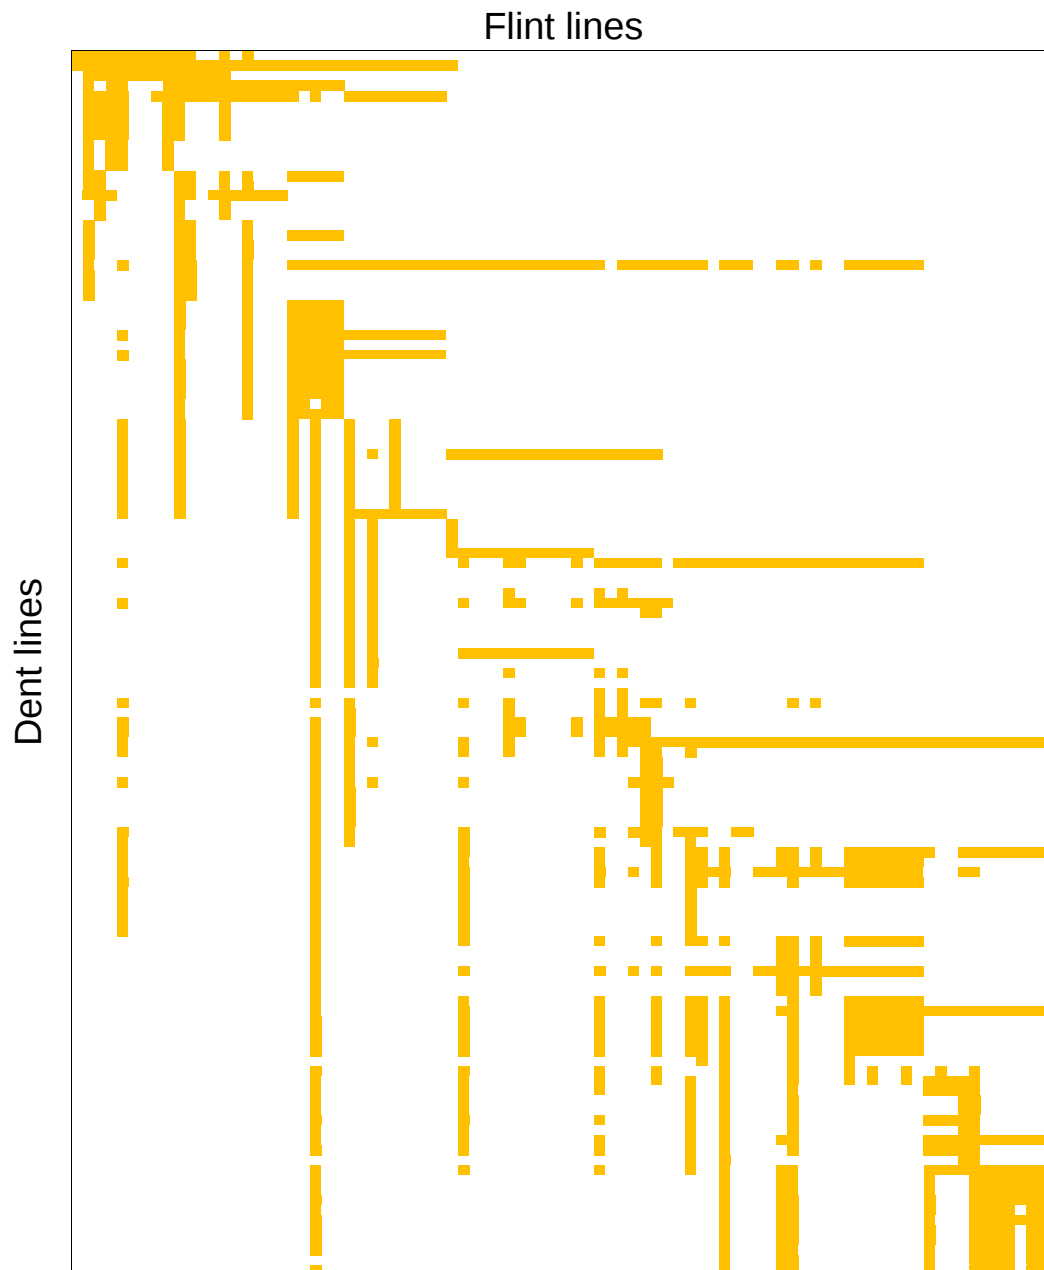

**Figure S1 Schematic illustration of factorial.** Schematic view of factorial of 123 Dent and 86 Flint lines for illustration purposes. The lines appear in approximately chronological order. Produced and tested hybrids are indicated by orange squares.
